# Supplementary material for: Knowledge, attitude and practice of hepatitis B infection prevention among nursing students in the Upper West Region of Ghana: A cross-sectional study
Source: PLOS journal article supplement (doi:10.1371/journal.pone.0258757), 2021-10-14
Supplement: S1 (10.1371/journal.pone.0258757.s001) [file journal.pone.0258757.s001]

## KNOWLEDGE, ATTITUDE AND PRACTICE (KAP) SCORING SCALE

| Section B: Knowledge Item questions                                                                      |                    |                |
|----------------------------------------------------------------------------------------------------------|--------------------|----------------|
| Question                                                                                                 | Option checked [✓] | Score (0 or 1) |
| 11. Is Hepatitis B infection caused by a partial double stranded DNA virus?                              | Yes [✓]            | 1              |
|                                                                                                          | No [✓]             | 0              |
|                                                                                                          | Not sure [✓]       | 0              |
| 12. Is Jaundice a symptom of hepatitis B infection?                                                      | Yes [✓]            | 1              |
|                                                                                                          | No [✓]             | 0              |
|                                                                                                          | Not sure [✓]       | 0              |
| 13. Do all hepatitis B infected people present with signs/symptoms?                                      | Yes [✓]            | 0              |
|                                                                                                          | No [✓]             | 1              |
|                                                                                                          | Not sure [✓]       | 0              |
| 14. Can carriers of hepatitis B who are not sick pass the infection to others?                           | Yes [✓]            | 1              |
|                                                                                                          | No [✓]             | 0              |
|                                                                                                          | Not sure [✓]       | 0              |
| 15. Is hepatitis B virus transmitted via the faeco-oral route?                                           | Yes [✓]            | 0              |
|                                                                                                          | No [✓]             | 1              |
|                                                                                                          | Not sure [✓]       | 0              |
| 16. Is hepatitis B infection transmitted through casual contact such as holding of hands?                | Yes [✓]            | 0              |
|                                                                                                          | No [✓]             | 1              |
|                                                                                                          | Not sure [✓]       | 0              |
| 17. Can hepatitis B infection be transmitted through contaminated blood and blood products?              | Yes [✓]            | 1              |
|                                                                                                          | No [✓]             | 0              |
|                                                                                                          | Not sure [✓]       | 0              |
| 18. Can hepatitis B infection be transmitted by unsterilized syringes, needles and surgical instruments? | Yes [✓]            | 1              |
|                                                                                                          | No [✓]             | 0              |
|                                                                                                          | Not sure [✓]       | 0              |
| 19. Can hepatitis B infection be transmitted via unprotected sex?                                        | Yes [✓]            | 1              |
|                                                                                                          | No [✓]             | 0              |
|                                                                                                          | Not sure [✓]       | 0              |
| 20. Can hepatitis B infection be passed from a mother to her baby at birth?                              | Yes [✓]            | 1              |
|                                                                                                          | No [✓]             | 0              |
|                                                                                                          | Not sure [✓]       | 0              |
| 21. Is hepatitis B infection diagnosed by serological Rapid Diagnostic Test?                             | Yes [✓]            | 1              |
|                                                                                                          | No [✓]             | 0              |
|                                                                                                          | Not sure [✓]       | 0              |
| 22. Can diagnosis of hepatitis B infection be done by a molecular test?                                  | Yes [✓]            | 1              |
|                                                                                                          | No [✓]             | 0              |
|                                                                                                          | Not sure [✓]       | 0              |
| 23. Is hepatitis B infection curable?                                                                    | Yes [✓]            | 0              |
|                                                                                                          | No [✓]             | 1              |
|                                                                                                          | Not sure [✓]       | 0              |

|                                                                                                                       |                                                                                           |                       |
|-----------------------------------------------------------------------------------------------------------------------|-------------------------------------------------------------------------------------------|-----------------------|
| 24. Can hepatitis B virus cause liver cancer?                                                                         | Yes [✓]<br>No [✓]<br>Not sure [✓]                                                         | 1<br>0<br>0           |
| 25. Is the hepatitis B vaccine made from human blood?                                                                 | Yes [✓]<br>No [✓]<br>Not sure [✓]                                                         | 0<br>1<br>0           |
| 26. Does hepatitis B vaccination prevent Hepatitis B infection?                                                       | Yes [✓]<br>No [✓]<br>Not sure [✓]                                                         | 1<br>0<br>0           |
| 27. Does hepatitis B vaccine protect against liver cancer?                                                            | Yes [✓]<br>No [✓]<br>Not sure [✓]                                                         | 1<br>0<br>0           |
| 28. Does hepatitis B infection have post-exposure prophylaxis?                                                        | Yes [✓]<br>No [✓]<br>Not sure [✓]                                                         | 1<br>0<br>0           |
| <b>Section C: Attitude Item Questions</b>                                                                             |                                                                                           |                       |
| <b>Question</b>                                                                                                       | <b>Option checked [✓]</b>                                                                 | <b>Score (0 or 1)</b> |
| 29. You are at risk of getting hepatitis B infection                                                                  | Strongly Agree [✓]<br>Agree [✓]<br>Uncertain [✓]<br>Disagree [✓]<br>Strongly disagree [✓] | 1<br>1<br>0<br>0<br>0 |
| 30. Occasional contact with blood will not necessarily increase my risk of getting hepatitis B infection              | Strongly Agree [✓]<br>Agree [✓]<br>Uncertain [✓]<br>Disagree [✓]<br>Strongly disagree [✓] | 0<br>0<br>0<br>1<br>1 |
| 31. Wearing personal protective equipment during surgery is unnecessary                                               | Strongly Agree [✓]<br>Agree [✓]<br>Uncertain [✓]<br>Disagree [✓]<br>Strongly disagree [✓] | 0<br>0<br>0<br>1<br>1 |
| 32. Hepatitis B vaccination is unnecessary because acquiring hepatitis B infection is not as serious as HIV infection | Strongly Agree [✓]<br>Agree [✓]<br>Uncertain [✓]<br>Disagree [✓]<br>Strongly disagree [✓] | 0<br>0<br>0<br>1<br>1 |
| 33. Hepatitis B infection is not potentially serious because people who acquire it live normal lives                  | Strongly Agree [✓]<br>Agree [✓]<br>Uncertain [✓]<br>Disagree [✓]<br>Strongly disagree [✓] | 0<br>0<br>0<br>1<br>1 |

|                                                                                        |                                                                                           |                       |
|----------------------------------------------------------------------------------------|-------------------------------------------------------------------------------------------|-----------------------|
| 34. Hepatitis B infection is not potentially serious because it is treatable           | Strongly Agree [✓]<br>Agree [✓]<br>Uncertain [✓]<br>Disagree [✓]<br>Strongly disagree [✓] | 0<br>0<br>0<br>1<br>1 |
| 35. Occasional needle pricks don't require reporting to the healthcare authorities     | Strongly Agree [✓]<br>Agree [✓]<br>Uncertain [✓]<br>Disagree [✓]<br>Strongly disagree [✓] | 0<br>0<br>0<br>1<br>1 |
| 36. Occasional blood or body fluid splashes on the face don't require any reporting.   | Strongly Agree [✓]<br>Agree [✓]<br>Uncertain [✓]<br>Disagree [✓]<br>Strongly disagree [✓] | 0<br>0<br>0<br>1<br>1 |
| <b>Section D: Practice Item Questions</b>                                              |                                                                                           |                       |
| <b>Question</b>                                                                        | <b>Option checked [✓]</b>                                                                 | <b>Score (0 or 1)</b> |
| 37. Have you screened for Hepatitis B infection?                                       | Yes [✓]<br>No [✓]                                                                         | 1<br>0                |
| 38. Have you ever taken the hepatitis B vaccine?                                       | Yes [✓]<br>No [✓]                                                                         | 1<br>0                |
| 39. If yes to Q 38, how many doses of hepatitis B vaccine did you receive?             | 1 dose [✓]<br>2 doses [✓]<br>3 doses [✓]<br>> 3 doses [✓]                                 | 0<br>0<br>1<br>1      |
| 40. Have you done a post hepatitis B vaccination antibody test?                        | Yes [✓]<br>No [✓]                                                                         | 1<br>0                |
| 41. Do you change gloves for each patient during blood collection?                     | Always [✓]<br>Sometimes [✓]<br>Never [✓]                                                  | 1<br>0<br>0           |
| 42. Do you recap needles after use?                                                    | Always [✓]<br>Sometimes [✓]<br>Never [✓]                                                  | 0<br>0<br>1           |
| 43. To the best of your knowledge have you acquired needle stick injuries in the past? | Always [✓]<br>Sometimes [✓]<br>Never [✓]                                                  | 0<br>0<br>1           |
| 44. To the best of your knowledge have you splashed blood/body fluids on your body?    | Always [✓]<br>Sometimes [✓]<br>Never [✓]                                                  | 0<br>0<br>1           |
